# Supplementary material
Source: PubMed Central journal article supplement (PMC7987643)
Supplement: NIHMS1638648-supplement-sup_FigS1.pdf [file NIHMS1638648-supplement-sup_FigS1.pdf]

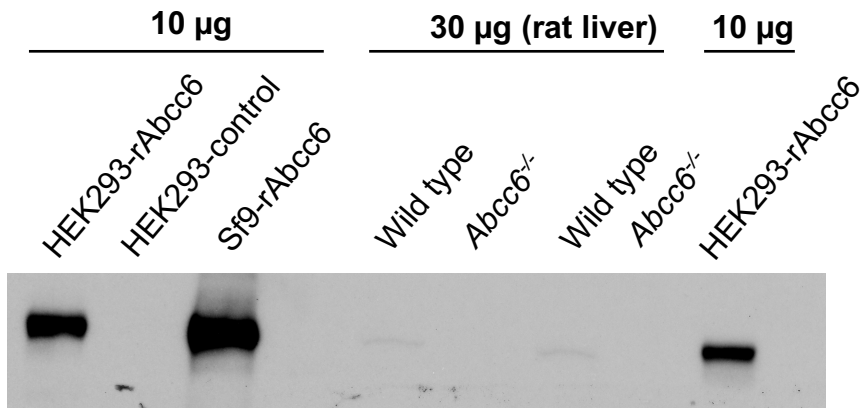

**Supplemental figure 1. Compared to rat liver, HEK293-rAbcc6 cells contain high amounts of rAbcc6.** rAbcc6 was detected by immunoblot analysis in wild type (Sprague Dawley, SD) liver homogenates and in lysates of HEK293-rAbcc6 cells as described in the materials and methods section. HEK293-control and Abcc6<sup>-/-</sup> liver homogenates were taken along as negative controls. Spodoptera frugiperda (Sf9) cells infected with a baculovirus encoding rAbcc6 was taken along as an additional positive control. Of note, the wild type rat liver lysates show only a very weak signal as compared to the HEK293 and Sf9 cells overexpressing rAbcc6.
