# Supplementary material
Source: PubMed Central journal article supplement (PMC7987643)
Supplement: NIHMS1638648-supplement-sup_FigS2.pdf [file NIHMS1638648-supplement-sup_FigS2.pdf]

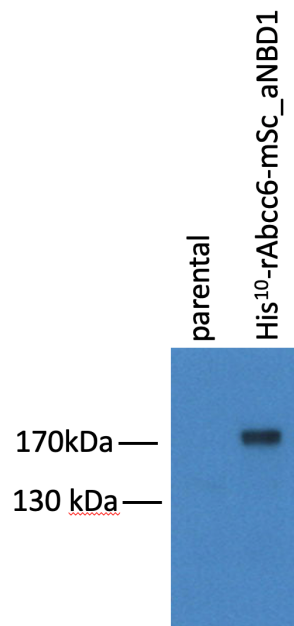

**Supplemental Figure 2: Expression of the N terminal His<sup>10</sup> tagged rAbcc6 red fluorescent fusion protein in HEK293 cells.** Immunoblot analysis showing the rAbcc6 protein with an N-terminal His<sup>10</sup> tag and an mScarlet fluorophore positioned after the first NBD of rAbcc6 probed with an anti-His<sup>6</sup> mouse monoclonal antibody (1:250X) and an HRP-conjugated anti-mouse secondary antibody (1:5000x).
